## ACKNOWLEDGMENT

The authors are indebted to Dr. John Lawrence, Department of Agricultural Chemistry, State College of Washington, for teaching techniques and loaning equipment in studying the nitrogen fraction of plants.

## REFERENCES CITED

- Arant, F. S., and C. M. Jones. 1951. Influence of lime and nitrogenous fertilizers on the population of greenbugs infesting oats. *Jour. Econ. Ent.* 44: 121-2.
- Auclair, J. L., J. B. Maltais, and J. J. Carier. 1957. Factors in resistance of peas to the pea aphid, *Acyrtosiphon pisum* (Harr.) (Homoptera: Aphididae). II. Amino acids. *Canadian Ent.* 89: 457-64.
- Barker, J. S., and O. E. Tauber. 1951. Fecundity of and plant injury by the pea aphid as influenced by nutritional changes in the garden pea. *Jour. Econ. Ent.* 44: 1010-11.
- Erickson, L. C., C. I. Seely, and K. H. Klages. 1948. Effect of 2,4-D upon the protein content of wheats. *Jour. Amer. Soc. Agron.* 40: 659-60.
- Evans, A. C. 1938. Physiological relationships between insects and their host plants. *Ann. Appl. Biol.* 25: 558-72.
- Fox, W. B. 1948. 2,4-D as a factor in increasing wireworm damage of wheat. *Sci. Agric.* 28: 423-4.
- Freiburg, S. R., and H. E. Clark. 1951. Effects of 2,4-Dichlorophenoxyacetic acid upon the nitrogen metabolism and water relations of soybean plants grown at different nitrogen levels. *Bot. Gaz.* 113: 322-33.
- Friend, W. G. 1958. Nutritional requirements of phytophagous insects. *Ann. Rev. Ent.* 3: 57-74.
- Fults, J. L., and M. G. Payne. 1956. Effects of 2,4-D and maleic hydrazide on free amino acids and proteins in potato, sugarbeet and bean tops. *Bot. Gaz.* 118: 130-3.
- Garmen, P., and B. H. Kennedy. 1949. Effect of soil fertilization on the rate of reproduction of the two-spotted spider mite. *Jour. Econ. Ent.* 42: 157-8.
- Hamstead, E. O., and E. Gould. 1957. Relation of mite populations to seasonal leaf nitrogen levels in apple orchards. *Jour. Econ. Ent.* 50: 109-10.
- Haseman, L. 1946. Influence of soil minerals on insects. *Jour. Econ. Ent.* 39: 8-11.
- Hay, J. R., and K. V. Thimann. 1956. The fate of 2,4-dichlorophenoxyacetic acid in bean seedlings. I. Recovery of 2,4-dichlorophenoxyacetic acid and its breakdown in the plant. *Plant Physiol.* 31: 382-7.
- Hoagland, D. R., and D. I. Aron. 1938. The water-culture method for growing plants without soil. *California Agric. Exper. Sta. Cir.* 347, 39 pp.
- Hocking, B. 1953. Larval nutrition in *Agrotis orthogonia* Morr. (Lepidoptera: Phalaenidae). A new rearing method. *Canadian Jour. Agric. Sci.* 33: 23-9.
- Ingram, J. W., E. K. Bynum, and L. J. Charpentier. 1947. Effect of 2,4-D on sugarcane borer. *Jour. Econ. Ent.* 40: 745-6.
- Jones, G. D. G., and J. U. Connell. 1954. The toxicity to worker honeybees (*Aphis mellifera*) of certain chemicals used in plant protection. *Ann. Appl. Biol.* 41: 271-9.
- de Jonge, P. 1955. Stimulation of yield in *Hevea brasiliensis*. III. Further observations on the effects of yield stimulants. *Jour. Rubber Research Inst. Malaya.* 14: 383-406. (Abstract in *Chem. Abs.* 49: 16489b. 1955).
- Kennedy, J. S., and H. L. G. Stroyan. 1959. Biology of aphids. *Ann. Rev. Ent.* 4: 139-60.
- Klingman, G. C., and G. H. Ahlgren. 1951. Effects of 2,4-D on dry weight, reducing sugars, total sugars, polysaccharides, nitrogen and allyl sulfides in wild garlic. *Bot. Gaz.* 113: 119-34.
- Lawrence, J. M., J. V. Miller, and L. W. Rasmussen. Estimation of amino acids in plant tissue by paper chromatography. *Washington Agric. Exp. Sta. Bull.* (in press).
- Lockart, R. Z., and H. Eagle. 1959. Requirements for growth of a single human cell. *Science* 129: 252-4.
- Pande, H. K. 1954. Effect of sodium dichlorophenoxyacetate on crop and weeds in the wheat fields. *Agra Univ. Jour. Research Sci.* 3: 241-52. (Abstract in *Chem. Abs.* 49: 556d. 1955).
- Putnam, L. G. 1949. The survival of grasshopper nymphs on vegetation treated with 2,4-D. *Sci. Agric.* 29: 396-9.
- Raleigh, S. M., and R. E. Patterson. 1948. Rodent injury on 2,4-D pre-emergence-treated corn. *Jour. Amer. Soc. Agron.* 40: 472-3.
- Raoul, Y., and C. Marnay. 1948. Action de l'acide indol-3-acétique et de l'acide 2,4-dichloro-phenoxy-acétique sur le Rat en voie de croissance. *C. R. Acad. Sci.* 226: 1043-45.
- Rasmussen, L. W. 1947. The physiological action of 2,4-D on dandelion, *Taraxacum officinale*. *Plant Physiol.* 22: 377-91.
- Rosen, H. 1957. A modified ninhydrin colorimetric analysis for amino acids. *Arch. Biochem. Biophys.* 67: 10-15.
- Singh, K. R. P., and A. W. A. Brown. 1957. Nutritional requirements of *Aedes aegypti* L. *Jour. Insect Physiol.* 1: 199-220.
- Smith, F. G., C. L. Hammer, and R. F. Carlson. 1947. Changes in food reserves and respiratory capacity of bindweed tissues accompanying herbicidal action of 2,4-dichlorophenoxyacetic acid. *Plant Physiol.* 22: 58-65.
- Stahler, L. M., and E. I. Whitehead. 1950. The effect of 2,4-D on potassium nitrate levels in leaves of sugarbeets. *Science* 112: 749-51.
- Steyermark, A. 1951. Quantitative organic micro-analysis. Blakiston, Phila.
- Taylor, L. F., J. W. Apple, and K. C. Berger. 1952. Response of certain insects to plants grown on varying fertility levels. *Jour. Econ. Ent.* 45: 843-8.
- Trager, W. 1953. In: *Insect Physiology*. Edited by K. D. Roeder. John Wiley and Sons, Inc., New York.
- Wort, D. J. 1951. Effects of non-lethal concentrations of 2,4-D on buckwheat. *Plant Physiol.* 26: 50-8.

## ERRATUM

The center heading in column 2, p. 124, Vol. 53 (1960), No. 1 of the ANNALS OF THE ENTOMOLOGICAL SOCIETY OF AMERICA should be changed to read as follows: "Paraterellia ypsilon, new species (Figs. 2, 4, 7)."
